# Supplementary material for: ADDition of DAPAgliflozin, Sodium-Glucose Cotransporter-2 Inhibitor to Angiotensin Receptor Blocker-Neprilysin Inhibitors Non-Responders in Patient with Refractory Heart Failure with Reduced Ejection Fraction (ADD DAPA trial)
Source: PubMed Central journal article supplement — Indian Heart J. 2021 Jul 19;73(5):605–11. doi: 10.1016/j.ihj.2021.07.005 (PMC8514411; doi:10.1016/j.ihj.2021.07.005), 2021-07-19
Supplement: mmc1.pdf [file mmc1.pdf]

**INSTITUTIONAL ETHICS COMMITTEE  
YASHODA ACADEMY OF MEDICAL EDUCATION AND RESEARCH  
(IEC-YAMER)**

Yashoda Hospital, Behind Harihara Kala Bhavan, Secunderabad- 500003 (T.S)

**Reg.No.ECR/49/Inst/AP/2013/RR-19**

**Chairman:** Justice V.BHASKAR RAO  
(Retd.) Judge, High Court of A.P

**Member:** Dr.I.DINAKAR  
Consultant Neuro Surgeon,  
Yashoda Hospital, Secunderabad

**Member:** Dr.S.MANIMALA RAO,  
**Secretary** Chief Anesthesiologist & Intensivist,  
Yashoda Hospital, Somajiguda, Hyderabad

**Member:** Sri. S.A.DANIEL  
Chief Operating Officer,  
Joyce Meyer Ministries, Nanakramguda, Hyd.

**Member:** Dr. B. SESI KERAN  
Former Director,  
National Institute of Nutrition (ICMR)  
Hyderabad.

**Member:** Dr.P.NAVANITH SAGAR REDDY  
Sr.Consultant Pulmonologist,  
Yashoda Hospital, Somajiguda, Hyderabad.  
Retd.Prof. & Head Dept. of Pulmonary Medicine,  
Osmania Medical College, Hyderabad

**Member:** Dr. D.GOVINDA DAS  
Retd. Professor of Clinical Pharmacology  
Osmania Medical College, Hyderabad

**Member:** Sri.L.HANUMANTH RAO  
Hony.Vive-President,  
Indian Red Cross Society, A.P.  
Hyderabad.

**Member:** Dr.( Mrs.) MEENA HARIHARAN  
Director,  
Center for Health Psychology.  
University of Hyderabad

**Joint:** Dr.BVCS.SRINIVASARAO  
**Secretary** Research Coordinator,  
Yashoda Group of Hospitals, Hyderabad.

DC/PP-01/2021

Permission letter

05<sup>th</sup> April 2021

To  
Dr.Pankaj Jariwala,  
Consultant Interventioanl Cardiologist  
Yashoda Hospital, Somajiguda, Hyderabad.

Sub: Permission letter "The Addition of Dapagliflozin, Sodium-Glucose Co-Transporter-2 Inhibitor (SGLT2I) to Angiotensin Receptor Blocker-Nepriylsin Inhibitors [ARNI] Non-Responders in patient with Refractory Heart Failure with Reduced Ejection Fraction [HFREF]. (ADD DAPA TRIAL) "

Ref: Your letter dated 05<sup>th</sup> April 2021

Dear Sir,

The IEC-YAMER has given permission to do the study at Yashoda Hosptial, Somajiguda, Hyderabad  
**Title "The Addition of Dapagliflozin, Sodium-Glucose Co-Transporter-2 Inhibitor (SGLT2I) to Angiotensin Receptor Blocker-Nepriylsin Inhibitors [ARNI] Non-Responders in patient with Refractory Heart Failure with Reduced Ejection Fraction [HFREF]. (ADD DAPA TRIAL) "**

This study was Retrospective hence Informed Consent waved off.

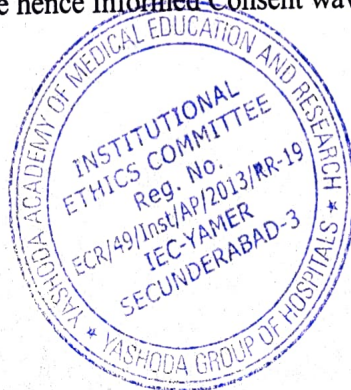

Yours Sincerely

  
Dr.BVCS.Srinivasarao,  
Joint Secretary-IEC-YAMER,  
Yashoda Group of Hospital, Hyderabad.

**INSTITUTIONAL ETHICS COMMITTEE  
YASHODA ACADEMY OF MEDICAL EDUCATION AND RESEARCH  
(IEC-YAMER)**

Yashoda Hospital, Behind Harihara Kala Bhavan, Secunderabad- 500003 (T.S)  
Reg.No.ECR/49/Inst/AP/2013/RR-19

**Chairman:** Justice V.BHASKAR RAO  
(Retd.) Judge, High Court of A.P

**Member:** Dr.I.DINAKAR  
Consultant Neuro Surgeon,  
Yashoda Hospital, Secunderabad

**Member:** Dr.S.MANIMALA RAO,  
**Secretary** Chief Anesthesiologist & Intensivist,  
Yashoda Hospital, Somajiguda, Hyderabad

**Member:** Sri. S.A.DANIEL  
Chief Operating Officer,  
Joyce Meyer Ministries, Nanakramguda, Hyd.

**Member:** Dr. B. SESI KERAN  
Former Director,  
National Institute of Nutrition (ICMR)  
Hyderabad.

**Member:** Dr.P.NAVANITH SAGAR REDDY  
Sr.Consultant Pulmonologist,  
Yashoda Hospital, Somajiguda, Hyderabad.  
Retd.Prof. & Head Dept. of Pulmonary Medicine,  
Osmania Medical College, Hyderabad

**Member:** Dr. D.GOVINDA DAS  
Retd. Professor of Clinical Pharmacology  
Osmania Medical College, Hyderabad

**Member:** Sri.L.HANUMANTH RAO  
Hony.Vive-President,  
Indian Red Cross Society, A.P.  
Hyderabad.

**Member:** Dr.( Mrs.) MEENA HARIHARAN  
Director,  
Center for Health Psychology.  
University of Hyderabad

**Joint:** Dr.BVCS.SRINIVASARAO  
**Secretary** Research Coordinator,  
Yashoda Group of Hospitals, Hyderabad.

DC/PP-01/2021

Permission letter

05<sup>th</sup> April 2021

To  
Dr.Pankaj Jariwala,  
Consultant Interventional Cardiologist  
Yashoda Hospital, Somajiguda, Hyderabad.

Sub: Permission letter "The Addition of Dapagliflozin, Sodium-Glucose Co-Transporter-2 Inhibitor (SGLT2I) to Angiotensin Receptor Blocker-Nepriylsin Inhibitors [ARNI] Non-Responders in patient with Refractory Heart Failure with Reduced Ejection Fraction [HFREF]. (ADD DAPA TRIAL) "

Ref: Your letter dated 05<sup>th</sup> April 2021

Dear Sir,

The IEC-YAMER has given permission to do the study at Yashoda Hospital, Somajiguda, Hyderabad  
**Title "The Addition of Dapagliflozin, Sodium-Glucose Co-Transporter-2 Inhibitor (SGLT2I) to Angiotensin Receptor Blocker-Nepriylsin Inhibitors [ARNI] Non-Responders in patient with Refractory Heart Failure with Reduced Ejection Fraction [HFREF]. (ADD DAPA TRIAL) "**

This study was Retrospective hence Informed Consent waved off.

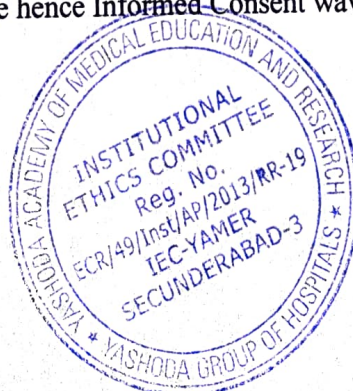

Yours Sincerely

  
Dr.BVCS.Srinivasarao,  
Joint Secretary-IEC-YAMER,  
Yashoda Group of Hospital, Hyderabad.
